# Supplementary material for: Contribution of Reliable Chromatographic Data in QSAR for Modelling Bisphenol Transport across the Human Placenta Barrier
Source: MDPI journal article supplement (doi:10.3390/molecules28020500), 2023-01-04
Supplement: s1 [file s1]

# Contribution of Reliable Chromatographic Data in QSAR for Modelling Bisphenol Transport across the Human Placenta Barrier

Clémence A. Gély <sup>1,2</sup>, Nicole Picard-Hagen <sup>1</sup>, Malika Chassan <sup>2</sup>, Jean-Christophe Garrigues <sup>3</sup>,  
Véronique Gayrard <sup>1</sup> and Marlène Z. Lacroix <sup>2,\*</sup>

<sup>1</sup> ToxAlim (Research Centre in Food Toxicology), National Research Institute for Agriculture, Food and Environment (INRAE), National Veterinary School of Toulouse (ENVT), University of Toulouse, 31076 Toulouse, France

<sup>2</sup> Therapeutic Innovations and Resistances (INTHERES), National Research Institute for Agriculture, Food and Environment (INRAE), National Veterinary School of Toulouse (ENVT), University of Toulouse, 31076 Toulouse, France

<sup>3</sup> Molecular Interactions and Chemical and Photochemical Reactivity Laboratory (IMRCP), University of Toulouse, 31062 Toulouse, France

\* Correspondence: marlene.lacroix@envt.fr

R codes to carry out ANN, with input, the descriptors and output the clearance indices.

```
library(neuralnet)
data=cbind.data.frame(input,output)
train=data$output
formule= paste(colnames(data[-ncol(data)]),collapse = "+")
print(formule)
formule=paste("train ~ ",formule,sep = "")
print(formule)
set.seed(100)
neuralnet=neuralnet::neuralnet(as.formula(formule),data=data,hidden = 0, linear.output = FALSE, stepmax
= 100000, threshold = 0.005)
```

**Table S1:** Molecular descriptors used in QSAR development. Molecular descriptors for the 15 bisphenols are described in the Excel file supplementary data.

| Molecular descriptors |                                   |                      |                 |
|-----------------------|-----------------------------------|----------------------|-----------------|
|                       | Molecular parameters              | Units                | Descriptor name |
| ChemPropPro           | Molecular weight                  | g/mol                | MM              |
|                       | Boiling Point                     | Kelvin               | CPP 1           |
|                       | Critical Pressure                 | Bar                  | CPP 2           |
|                       | Critical Temperature              | Kelvin               | CPP 3           |
|                       | Critical Volume                   | cm <sup>3</sup> /mol | CPP 4           |
|                       | Gibbs Free Energy                 | kJ/mol               | CPP 5           |
|                       | Heat Of Formation                 | kJ/mol               | CPP 6           |
|                       | Henry's Law constant              |                      | CPP 7           |
|                       | Ideal Gas Thermal Capacity        | J/(mol.K)            | CPP 8           |
|                       | logP                              |                      | CPP 9           |
|                       | Melting Point                     | Kelvin               | CPP 10          |
|                       | Mol Refractivity                  | cm <sup>3</sup> /mol | CPP 11          |
| Log P                 | Log P Viswanadhan's fragmentation |                      | LP 2            |
|                       | Log P Broto's fragmentation       |                      | LP 3            |
| MR                    | MR Crippen's fragmentation        | cm <sup>3</sup> /mol | MR 1            |
|                       | MR Viswanadhan's fragmentation    | cm <sup>3</sup> /mol | MR 2            |
| ChemPropStd           | Connolly Accessible Area          | Å <sup>2</sup>       | CPS 1           |
|                       | Connolly Molecular Area           | Å <sup>2</sup>       | CPS 2           |
|                       | Connolly Solvent Excluded Volume  | Å <sup>3</sup>       | CPS 3           |
|                       | Number of HBond Acceptors         |                      | CPS 4           |
| CLogP Driver          | Mol Refractivity                  |                      | CD 1            |
|                       | Partition Coefficient             |                      | CD 2            |
| Molecular Networks    | Log P                             |                      | MN 1            |
|                       | Log S                             |                      | MN 2            |
|                       | pKa1                              |                      | MN 3            |
|                       | pKa2                              |                      | MN 4            |
| Molecular Topology    | Balaban Index                     |                      | MT 1            |
|                       | Cluster Count                     |                      | MT 2            |
|                       | Molecular Topological Index       |                      | MT 3            |
|                       | Num Rotatable Bonds               | Bonds                | MT 4            |
|                       | Polar Surface Area                | Å <sup>2</sup>       | MT 5            |
|                       | Radius                            | Atoms                | MT 6            |
|                       | Shape Attribute                   |                      | MT 7            |
|                       | Shape Coefficient                 |                      | MT 8            |
|                       | Sum Of Degrees                    |                      | MT 9            |

|                        |                            |                |       |
|------------------------|----------------------------|----------------|-------|
|                        | Sum Of Valence Degrees     |                | MT 10 |
|                        | Topological Diameter       | Bonds          | MT 11 |
|                        | Total Connectivity         |                | MT 12 |
|                        | Total Valence Connectivity |                | MT 13 |
|                        | Wiener Index               |                | MT 14 |
| Electronic descriptors | Heat of formation          | kJ/mol         | DE 1  |
|                        | Total Energy               | eV             | DE 2  |
|                        | Electronic Energy          | eV             | DE 3  |
|                        | Core-core repulsion        | eV             | DE 4  |
|                        | Cosmo Area                 | Å <sup>2</sup> | DE 5  |
|                        | Cosmo Volume               | Å <sup>3</sup> | DE 6  |
|                        | Ionisation Potential       | eV             | DE 7  |
|                        | Homo Energy                | eV             | DE 8  |
|                        | Lumo Energy                | eV             | DE 9  |
|                        | Dipole moment              | debye          | DE 10 |

Table S2: Chromatographic descriptors used in QSAR development. Chromatographic descriptors values for the 15 bisphenols are available in Excel file supplementary data.

| Chromatographic descriptors          |                            |       |                 |
|--------------------------------------|----------------------------|-------|-----------------|
| Column / solvent                     | Chromatographic parameters | Units | Descriptor name |
| BEH C18 100*2.1 1.7 µm AcN           | Width 5%                   | min   | C18A 2          |
|                                      | Retention Factor /BPA      |       | C18A 5          |
|                                      | Asymmetry                  |       | C18A 7          |
|                                      | Peak Tailing               |       | C18A 8          |
| CSH Phenyl hexyl 100*2.1 1.7 µm AcN  | Width 5%                   | min   | PHA 2           |
|                                      | Retention Factor /BPA      |       | PHA 5           |
|                                      | Asymmetry                  |       | PHA 7           |
|                                      | Peak Tailing               |       | PHA 8           |
| CSH Fluoro Phenyl 100*2.1 1.7 µm ACN | Width 5%                   | min   | FPA 2           |
|                                      | Retention Factor /BPA      |       | FPA 5           |
|                                      | Asymmetry                  |       | FPA 7           |
|                                      | Peak Tailing               |       | FPA 8           |
| BEH C8 100*2.1 1.7 µm ACN            | Width 5%                   | min   | C8A 2           |
|                                      | Retention Factor /BPA      |       | C8A 5           |
|                                      | Asymmetry                  |       | C8A 7           |
|                                      | Peak Tailing               |       | C8A 8           |
| BEH Phenyl 100*2.1 1.7 µm ACN        | Width 5%                   | min   | PA 2            |
|                                      | Retention Factor /BPA      |       | PA 5            |
|                                      | Asymmetry                  |       | PA 7            |

|                                                  |                       |     |         |
|--------------------------------------------------|-----------------------|-----|---------|
|                                                  | Peak Tailing          |     | PA 8    |
| HSS T3 100*2.1 1.8 µm ACN                        | Width 5%              | min | T3A 2   |
|                                                  | Retention Factor /BPA |     | T3A 5   |
|                                                  | Asymmetry             |     | T3A 7   |
|                                                  | Peak Tailing          |     | T3A 8   |
| raptor biphenyl<br>100*2.1 2.7 µm ACN            | Width 5%              | min | RBA 2   |
|                                                  | Retention Factor /BPA |     | RBA 5   |
|                                                  | Asymmetry             |     | RBA 7   |
|                                                  | Peak Tailing          |     | RBA 8   |
| HSS PFP 100*2.1 1.8 µm ACN                       | Width 5%              | min | PFPA 2  |
|                                                  | Retention Factor /BPA |     | PFPA 5  |
|                                                  | Asymmetry             |     | PFPA 7  |
|                                                  | Peak Tailing          |     | PFPA 8  |
| BEH RP18 Shield<br>100*2.1 1.7 µm ACN            | Width 5%              | min | RPA 2   |
|                                                  | Retention Factor /BPA |     | RPA 5   |
|                                                  | Asymmetry             |     | RPA 7   |
|                                                  | Peak Tailing          |     | RPA 8   |
| HSS CYANO 100*2.1 1.8 µm ACN                     | Width 5%              | min | CNA 2   |
|                                                  | Retention Factor /BPA |     | CNA 5   |
|                                                  | Asymmetry             |     | CNA 7   |
|                                                  | Peak Tailing          |     | CNA 8   |
| Force Biphenyl 100*2.1 1.8 µm ACN                | Width 5%              | min | FBA 2   |
|                                                  | Retention Factor /BPA |     | FBA 5   |
|                                                  | Asymmetry             |     | FBA 7   |
|                                                  | Peak Tailing          |     | FBA 8   |
| Raptor (Corshell)<br>Biphenyl 100*2.1 1.8 µm ACN | Width 5%              | min | RCBA 2  |
|                                                  | Retention Factor /BPA |     | RCBA 5  |
|                                                  | Asymmetry             |     | RCBA 7  |
|                                                  | Peak Tailing          |     | RCBA 8  |
| Cortecs C18 +<br>(corshell)100*2.1 1.6 µm ACN    | Width 5%              | min | CC18A 2 |
|                                                  | Retention Factor /BPA |     | CC18A 5 |
|                                                  | Asymmetry             |     | CC18A 7 |
|                                                  | Peak Tailing          |     | CC18A 8 |
| BEH C18 100*2.1 1.7 µm MeOH                      | Width 5%              | min | C18M 2  |
|                                                  | Retention Factor /BPA |     | C18M 5  |
|                                                  | Asymmetry             |     | C18M 7  |
|                                                  | Peak Tailing          |     | C18M 8  |
| CSH Phenyl hexyl<br>100*2.1 1.7 µm MeOH          | Width 5%              | min | PHM 2   |
|                                                  | Retention Factor /BPA |     | PHM 5   |
|                                                  | Asymmetry             |     | PHM 7   |
|                                                  | Peak Tailing          |     | PHM 8   |

|                                                      |                       |     |         |
|------------------------------------------------------|-----------------------|-----|---------|
| CSH Fluoro Phenyl<br>100*2.1 1.7 µm MeOH             | Width 5%              | min | FPM 2   |
|                                                      | Retention Factor /BPA |     | FPM 5   |
|                                                      | Asymmetry             |     | FPM 7   |
|                                                      | Peak Tailing          |     | FPM 8   |
| BEH C8 100*2.1 1.7 µm<br>MeOH                        | Width 5%              | min | C8M 2   |
|                                                      | Retention Factor /BPA |     | C8M 5   |
|                                                      | Asymmetry             |     | C8M 7   |
|                                                      | Peak Tailing          |     | C8M 8   |
| BEH Phenyl 100*2.1 1.7<br>µm MeOH                    | Width 5%              | min | PM 2    |
|                                                      | Retention Factor /BPA |     | PM 5    |
|                                                      | Asymmetry             |     | PM 7    |
|                                                      | Peak Tailing          |     | PM 8    |
| HSS T3 100*2.1 1.8 µm<br>MeOH                        | Width 5%              | min | T3M 2   |
|                                                      | Retention Factor /BPA |     | T3M 5   |
|                                                      | Asymmetry             |     | T3M 7   |
|                                                      | Peak Tailing          |     | T3M 8   |
| raptor biphenyl<br>100*2.1 2.7 µm MeOH               | Width 5%              | min | RBM 2   |
|                                                      | Retention Factor /BPA |     | RBM 5   |
|                                                      | Asymmetry             |     | RBM 7   |
|                                                      | Peak Tailing          |     | RBM 8   |
| HSS PFP 100*2.1 1.8<br>µm MeOH                       | Width 5%              | min | PFPM 2  |
|                                                      | Retention Factor /BPA |     | PFPM 5  |
|                                                      | Asymmetry             |     | PFPM 7  |
|                                                      | Peak Tailing          |     | PFPM 8  |
| BEH RP18 Shield<br>100*2.1 1.7 µm MeOH               | Width 5%              | min | RPM 2   |
|                                                      | Retention Factor /BPA |     | RPM 5   |
|                                                      | Asymmetry             |     | RPM 7   |
|                                                      | Peak Tailing          |     | RPM 8   |
| HSS CYANO 100*2.1<br>1.8 µm MeOH                     | Width 5%              | min | CNM 2   |
|                                                      | Retention Factor /BPA |     | CNM 5   |
|                                                      | Asymmetry             |     | CNM 7   |
|                                                      | Peak Tailing          |     | CNM 8   |
| Force Biphenyl 100*2.1<br>1.8 µm MeOH                | Width 5%              | min | FBM 2   |
|                                                      | Retention Factor /BPA |     | FBM 5   |
|                                                      | Asymmetry             |     | FBM 7   |
|                                                      | Peak Tailing          |     | FBM 8   |
| Raptor (Corshell)<br>Biphenyl 100*2.1 1.8 µm<br>MeOH | Width 5%              | min | RCBM 2  |
|                                                      | Retention Factor /BPA |     | RCBM 5  |
|                                                      | Asymmetry             |     | RCBM 7  |
|                                                      | Peak Tailing          |     | RCBM 8  |
|                                                      | Width 5%              | min | CC18M 2 |

|                                                         |                              |  |                |
|---------------------------------------------------------|------------------------------|--|----------------|
| <b>Cortecs C18 + (corshell)<br/>100*2.1 1.6 µm MeOH</b> | <b>Retention Factor /BPA</b> |  | <b>CC18M 5</b> |
|                                                         | <b>Asymmetry</b>             |  | <b>CC18M 7</b> |
|                                                         | <b>Peak Tailing</b>          |  | <b>CC18M 8</b> |

Table S3: Predicted clearance indices for the 15 bisphenols determined using three QSAR models based on either molecular descriptors, a combination of molecular and chromatographic descriptors or chromatographic descriptors. Leverage values were determined with R software package olsrr, leverage higher than threshold given by Olsrr were identified the asterisk. Predicted CI were compared with the observed clearance indices of the 15 bisphenols determined on five perfused human placentae.

| Bisphenol | Observed CI | Molecular descriptors |          | Molecular and chromatographic descriptors |          | Chromatographic descriptors |          |
|-----------|-------------|-----------------------|----------|-------------------------------------------|----------|-----------------------------|----------|
|           |             | Predicted CI          | Leverage | Predicted CI                              | Leverage | Predicted CI                | Leverage |
| 33BPA     | 0.65        | 0.69                  | 0.03     | 0.62                                      | 0.06     | 0.67                        | 0.05     |
|           | 0.82        |                       | 0.03     |                                           | 0.05     |                             | 0.04     |
|           | 0.66        |                       | 0.03     |                                           | 0.06     |                             | 0.05     |
|           | 0.73        |                       | 0.03     |                                           | 0.06     |                             | 0.04     |
|           | 0.75        |                       | 0.03     |                                           | 0.05     |                             | 0.04     |
| BP44      | 0.75        | 0.63                  | 0.04     | 0.59                                      | 0.08     | 0.63                        | 0.17     |
|           | 0.78        |                       | 0.04     |                                           | 0.08     |                             | 0.16     |
|           | 0.47        |                       | 0.07     |                                           | 0.13     |                             | 0.27*    |
|           | 0.57        |                       | 0.05     |                                           | 0.11     |                             | 0.22*    |
|           | 0.74        |                       | 0.04     |                                           | 0.09     |                             | 0.17     |
| BPA       | 0.70        | 0.64                  | 0.02     | 0.76                                      | 0.03     | 0.62                        | 0.03     |
|           | 0.85        |                       | 0.02     |                                           | 0.03     |                             | 0.03     |
|           | 0.81        |                       | 0.02     |                                           | 0.03     |                             | 0.03     |
|           | 0.85        |                       | 0.02     |                                           | 0.03     |                             | 0.03     |
|           | 0.85        |                       | 0.02     |                                           | 0.03     |                             | 0.03     |
| BPAF      | 0.42        | 0.49                  | 0.24*    | 0.51                                      | 0.17     | 0.57                        | 0.14     |
|           | 0.49        |                       | 0.21*    |                                           | 0.15     |                             | 0.12     |
|           | 0.60        |                       | 0.17*    |                                           | 0.12     |                             | 0.10     |
|           | 0.54        |                       | 0.19*    |                                           | 0.13     |                             | 0.11     |
|           | 0.57        |                       | 0.18*    |                                           | 0.13     |                             | 0.10     |
| BPAP      | 0.48        | 0.39                  | 0.01     | 0.63                                      | 0.07     | 0.60                        | 0.04     |
|           | 0.53        |                       | 0.01     |                                           | 0.06     |                             | 0.04     |
|           | 0.62        |                       | 0.01     |                                           | 0.05     |                             | 0.03     |
|           | 0.61        |                       | 0.01     |                                           | 0.06     |                             | 0.03     |
|           | 0.61        |                       | 0.01     |                                           | 0.06     |                             | 0.03     |
| BPB       | 0.71        | 0.64                  | 0.02     | 0.74                                      | 0.04     | 0.83                        | 0.10     |
|           | 0.87        |                       | 0.02     |                                           | 0.03     |                             | 0.08     |
|           | 0.88        |                       | 0.02     |                                           | 0.03     |                             | 0.08     |
|           | 0.83        |                       | 0.02     |                                           | 0.04     |                             | 0.09     |

|      |      |      |       |      |       |      |       |
|------|------|------|-------|------|-------|------|-------|
|      | 0.92 |      | 0.02  |      | 0.03  |      | 0.08  |
| BPBP | 0.20 | 0.14 | 0.04  | 0.21 | 0.17  | 0.29 | 0.12  |
|      | 0.24 |      | 0.04  |      | 0.14  |      | 0.10  |
|      | 0.28 |      | 0.03  |      | 0.12  |      | 0.09  |
|      | 0.24 |      | 0.04  |      | 0.14  |      | 0.10  |
|      | 0.32 |      | 0.03  |      | 0.11  |      | 0.08  |
| BPC  | 0.27 | 0.43 | 0.05  | 0.35 | 0.21* | 0.33 | 0.16  |
|      | 0.37 |      | 0.04  |      | 0.16  |      | 0.12  |
|      | 0.46 |      | 0.03  |      | 0.13  |      | 0.09  |
|      | 0.42 |      | 0.03  |      | 0.14  |      | 0.10  |
|      | 0.44 |      | 0.03  |      | 0.13  |      | 0.10  |
| BPE  | 0.54 | 0.63 | 0.03  | 0.77 | 0.06  | 0.69 | 0.10  |
|      | 0.91 |      | 0.02  |      | 0.04  |      | 0.06  |
|      | 0.70 |      | 0.03  |      | 0.05  |      | 0.08  |
|      | 0.75 |      | 0.02  |      | 0.04  |      | 0.07  |
|      | 0.53 |      | 0.03  |      | 0.06  |      | 0.11  |
| BPF  | 0.71 | 0.63 | 0.03  | 0.61 | 0.12  | 0.77 | 0.07  |
|      | 0.83 |      | 0.03  |      | 0.10  |      | 0.06  |
|      | 0.70 |      | 0.03  |      | 0.12  |      | 0.07  |
|      | 0.78 |      | 0.03  |      | 0.11  |      | 0.07  |
|      | 0.46 |      | 0.05  |      | 0.18  |      | 0.11  |
| BPFL | 0.04 | 0.08 | 0.24* | 0.06 | 0.29* | 0.06 | 0.29* |
|      | 0.05 |      | 0.20* |      | 0.23* |      | 0.23* |
|      | 0.08 |      | 0.12  |      | 0.14  |      | 0.14  |
|      | 0.06 |      | 0.16* |      | 0.19  |      | 0.19* |
|      | 0.09 |      | 0.11  |      | 0.13  |      | 0.13  |
| BPM  | 0.45 | 0.44 | 0.07  | 0.33 | 0.10  | 0.39 | 0.02  |
|      | 0.19 |      | 0.16  |      | 0.25* |      | 0.06  |
|      | 0.53 |      | 0.06  |      | 0.09  |      | 0.02  |
|      | 0.47 |      | 0.06  |      | 0.10  |      | 0.02  |
|      | 0.57 |      | 0.05  |      | 0.08  |      | 0.02  |
| BPP  | 0.49 | 0.43 | 0.06  | 0.50 | 0.10  | 0.32 | 0.01  |
|      | 0.40 |      | 0.07  |      | 0.12  |      | 0.01  |
|      | 0.41 |      | 0.07  |      | 0.12  |      | 0.01  |
|      | 0.45 |      | 0.07  |      | 0.11  |      | 0.01  |
|      | 0.51 |      | 0.06  |      | 0.10  |      | 0.01  |
| BPS  | 0.07 | 0.08 | 0.23* | 0.08 | 0.23* | 0.08 | 0.23* |
|      | 0.07 |      | 0.23* |      | 0.22* |      | 0.23* |
|      | 0.10 |      | 0.16* |      | 0.16  |      | 0.16  |
|      | 0.07 |      | 0.23* |      | 0.22* |      | 0.23* |
|      | 0.10 |      | 0.16* |      | 0.16  |      | 0.16  |
| BPZ  | 0.21 | 0.54 | 0.04  | 0.40 | 0.13  | 0.32 | 0.11  |
|      | 0.25 |      | 0.04  |      | 0.11  |      | 0.10  |
|      | 0.44 |      | 0.02  |      | 0.06  |      | 0.05  |
|      | 0.35 |      | 0.03  |      | 0.08  |      | 0.07  |





|                             |   |   |   |   |   |   |   |   |   |   |
|-----------------------------|---|---|---|---|---|---|---|---|---|---|
| Cluster Count               | X | X |   | X |   |   |   |   | X |   |
| Molecular Topological Index |   |   |   |   |   |   |   |   |   |   |
| Num Rotatable Bonds         |   |   |   |   |   |   |   |   |   |   |
| Polar Surface Area          | X | X | X | X | X |   | X | X | X | X |
| Radius                      |   |   |   |   |   |   | X |   |   |   |
| Shape Attribute             |   |   |   |   |   |   |   |   |   |   |
| Shape Coefficient           |   |   |   |   |   |   |   |   | X |   |
| Sum Of Degrees              |   |   |   |   |   |   |   |   |   |   |
| Sum Of Valence Degrees      |   |   |   |   |   | X |   |   |   |   |
| Topological Diameter        |   |   | X |   |   |   | X |   |   |   |
| Total Connectivity          | X |   |   |   |   |   |   |   | X |   |
| Total Valence Connectivity  | X |   |   |   |   |   |   |   | X |   |
| Wiener Index                |   |   |   |   |   |   |   |   |   |   |
| Heat of formation           | X | X |   | X | X | X | X | X | X | X |
| Total Energy                | X | X | X | X | X | X | X | X | X | X |
| Electronic Energy           |   |   |   |   |   |   |   |   |   |   |
| Core-core repulsion         |   |   |   |   |   |   |   |   |   |   |
| Cosmo Area                  | X | X | X | X | X | X | X | X | X | X |
| Cosmo Volume                |   |   |   |   |   |   |   |   |   |   |
| Ionisation Potential        | X | X | X | X | X |   |   | X |   | X |
| Homo Energy                 |   |   | X |   | X |   |   |   |   | X |
| Lumo Energy                 |   | X | X | X | X | X |   | X |   | X |
| Dipole moment               | X |   | X |   |   |   |   |   |   |   |
